# Supplementary material for: Smoking behavior and smoking index as prognostic indicators for patients with esophageal squamous cell carcinoma who underwent surgery: A large cohort study in Guangzhou, China
Source: PubMed Central journal article supplement (PMC7019194; doi:10.18332/tid/117428), 2020-02-12

**Supplementary file, Figure 1**

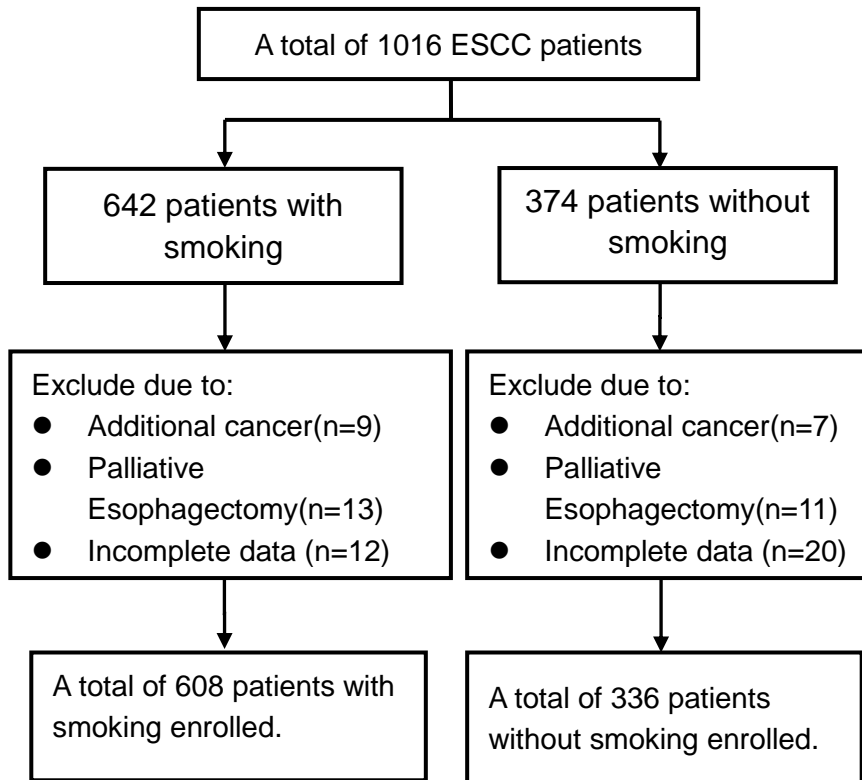

Supplement: TID-18-09-s1.pdf [file TID-18-09-s1.pdf]
