# Supplementary material for: Smoking behavior and smoking index as prognostic indicators for patients with esophageal squamous cell carcinoma who underwent surgery: A large cohort study in Guangzhou, China
Source: PubMed Central journal article supplement (PMC7019194; doi:10.18332/tid/117428), 2020-02-12
Supplement: TID-18-09-s2.pdf [file TID-18-09-s2.pdf]

**Supplementary Table 1. Analysis of the independent factors for disease-free survival among smoking ESCC patients, Guangzhou, 2005-2010 (N=944).**

| Variables       | Univariate analysis |             |       | Multivariate analysis |             |       |
|-----------------|---------------------|-------------|-------|-----------------------|-------------|-------|
|                 | HR                  | 95%CI       | P     | HR                    | 95%CI       | P     |
| Gender          | 0.504               | 0.069-3.652 | 0.497 |                       |             |       |
| Age             | 0.985               | 0.968-1.003 | 0.099 |                       |             |       |
| ALB             | 0.980               | 0.945-1.016 | 0.276 |                       |             |       |
| GLB             | 1.006               | 0.977-1.037 | 0.688 |                       |             |       |
| CEA             | 1.016               | 0.966-1.070 | 0.531 |                       |             |       |
| Tumor site      | 0.809               | 0.634-1.032 | 0.089 |                       |             |       |
| Tumor size      | 0.998               | 0.920-1.083 | 0.963 |                       |             |       |
| Differentiation | 1.084               | 0.884-1.328 | 0.438 |                       |             |       |
| TNM             | 1.365               | 1.089-1.712 | 0.007 | 1.435                 | 1.159-1.777 | 0.001 |
| Smoking index   | 1.455               | 1.085-2.150 | 0.032 | 1.070                 | 1.008-1.135 | 0.025 |
